# Supplementary material for: Gelatin-assisted co-exfoliation of graphene nanoplatelets/MoS2for high-performance supercapacitors
Source: Royal Society of Chemistry journal article supplement (doi:10.1039/d2se00653g), 2022-01-01
Supplement: d2se00653g1.pdf [file d2se00653g1.pdf]

## **Gelatin-Assisted Co-exfoliation of Graphene nanoplatelets/MoS<sub>2</sub> for High-Performance Supercapacitors**

Zahir Abbas,<sup>a</sup> Pranav Tiwari,<sup>a</sup> Viresh Kumar<sup>a</sup> Shaikh M. Mobin<sup>\*a, b, c,</sup>

<sup>a</sup> Department of Chemistry, Indian Institute of Technology Indore, Simrol, Khandwa Road, Indore 453552, India.

<sup>b</sup> Department of Biosciences and Biomedical Engineering, Indian Institute of Technology Indore, Simrol, Khandwa Road, Indore 453552, India.

<sup>c</sup> Center for Electric Vehicle and Intelligent Transport Systems, Indian Institute of Technology Indore, Simrol, Khandwa Road, Indore 453552, India.

\*E-mail: xray@iiti.ac.in

Tel: +91 731 6603 336

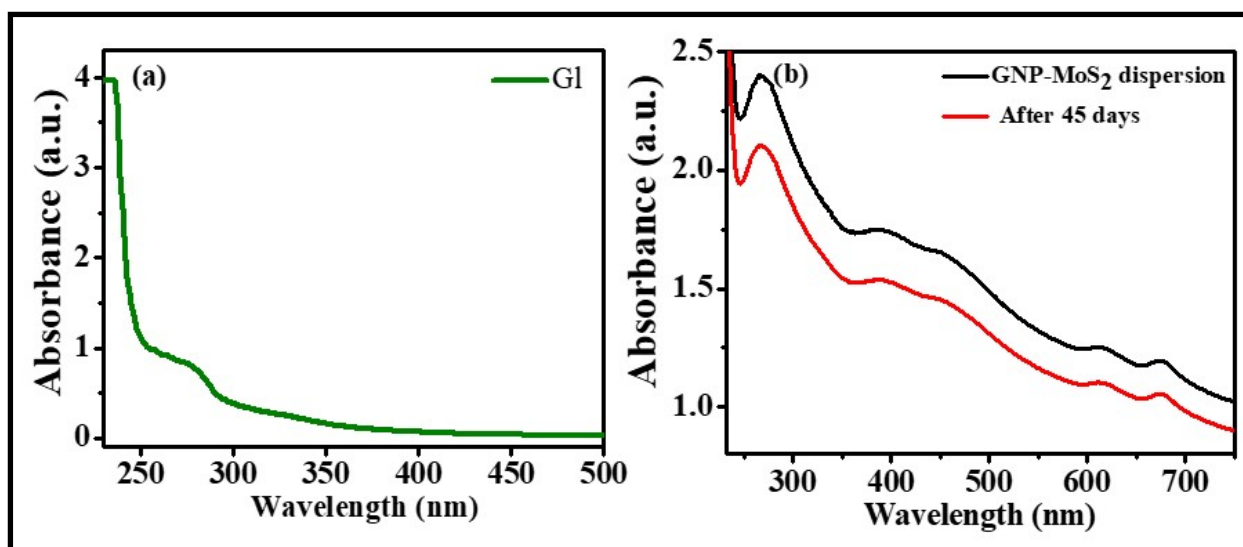

**Figure S1.** UV-vis spectrum (a) Gelatin solution (b) GNP/MoS<sub>2</sub> dispersion and stability after 45days.

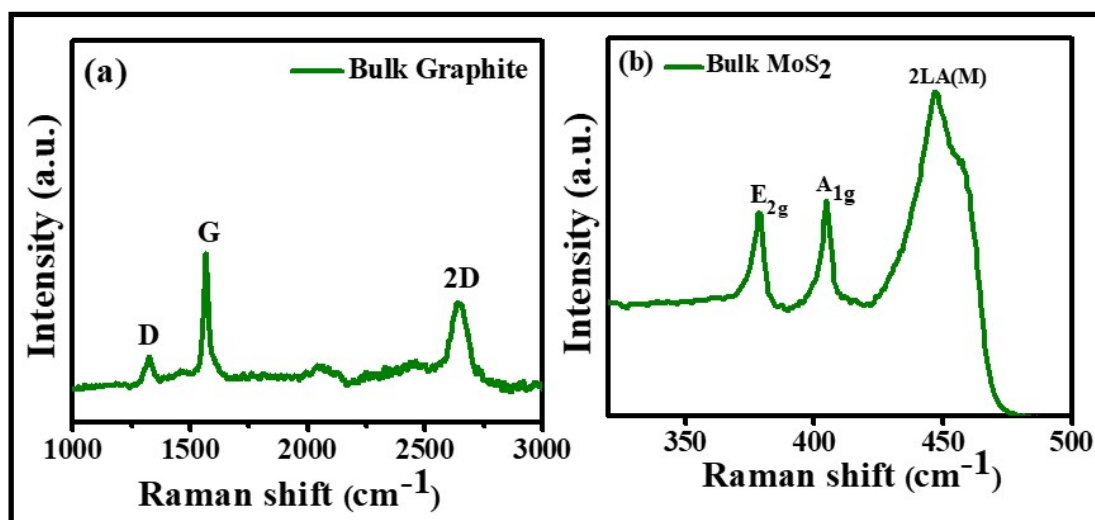

Figure S2. (a) Raman spectra of Bulk graphite (b) Bulk MoS<sub>2</sub>.

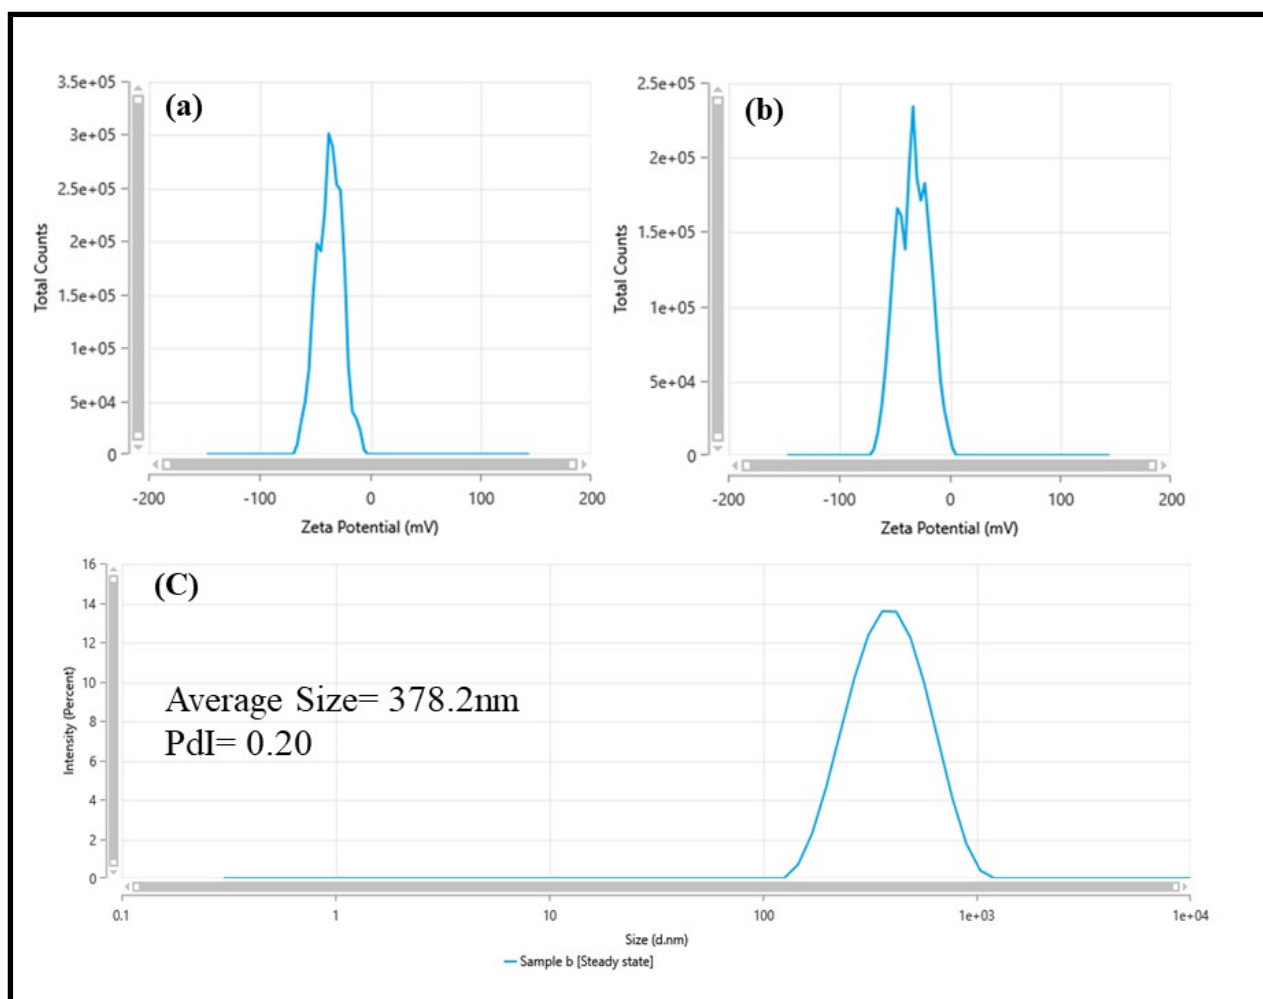

**Figure S3** (a) Zeta potential of gelatin (b) Zeta potential of GNP/MoS<sub>2</sub> dispersion (c) DLS of GNP/MoS<sub>2</sub> dispersion.

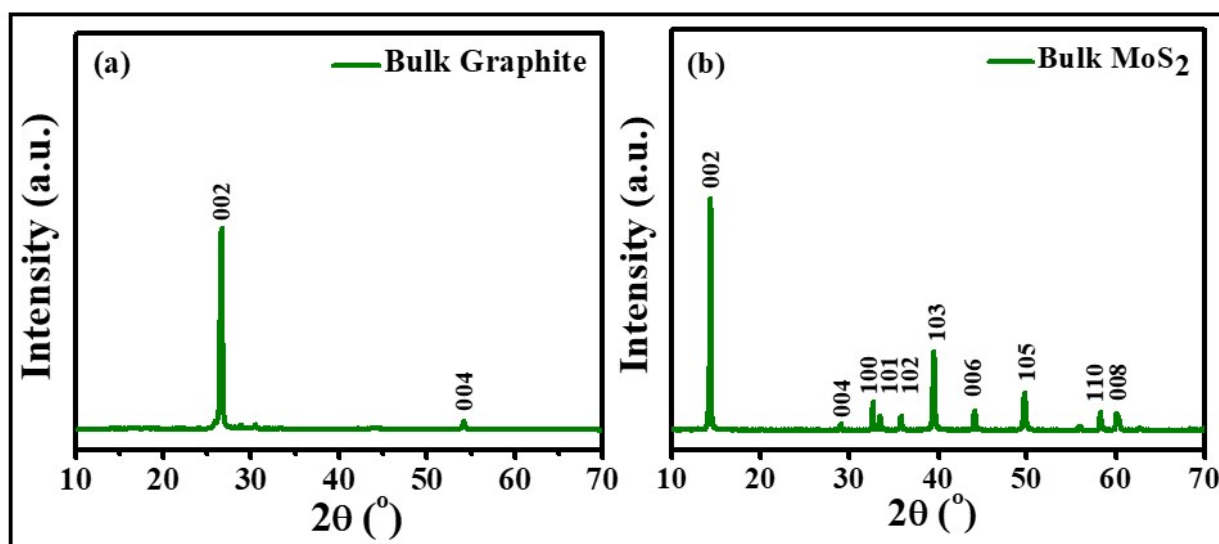

**Figure S4** (a) PXRD pattern of Bulk graphite (b) PXRD pattern of bulk  $\text{MoS}_2$ .

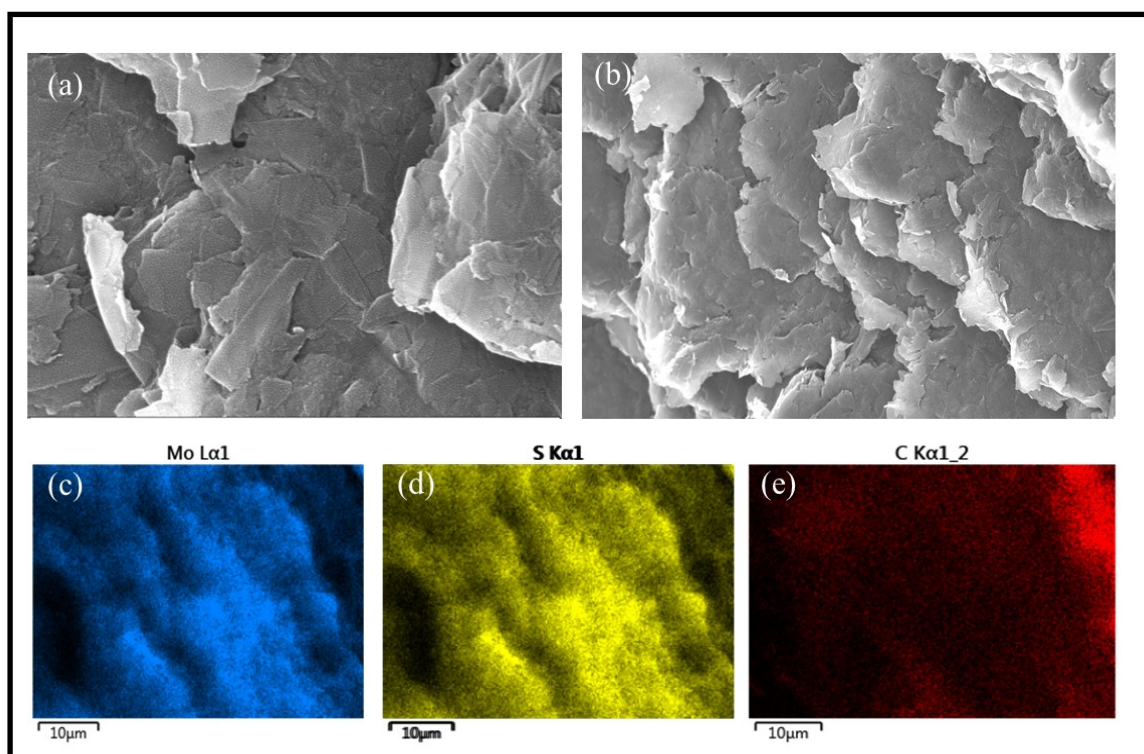

**Figure S5.** (a and b) SEM images of GNP/MoS<sub>2</sub> at different magnifications (scale bars: 200nm, 1 μm, respectively). (c) Mo, (d) S and (e) C for elemental mapping.

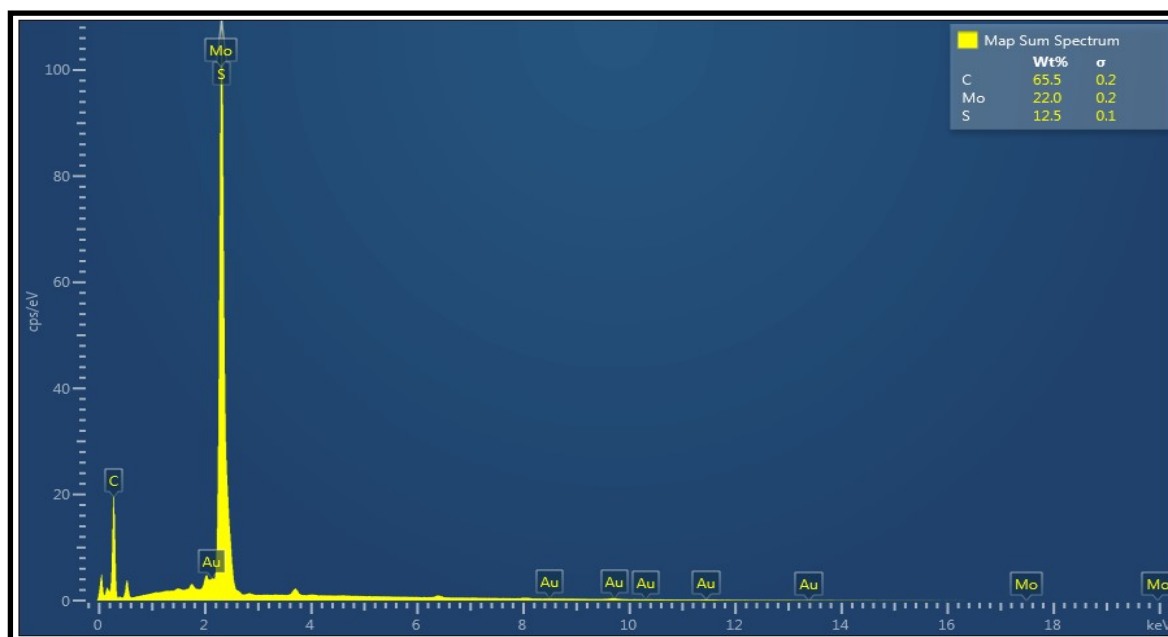

**Figure S6.** EDS spectrum of GNP/MoS<sub>2</sub>.

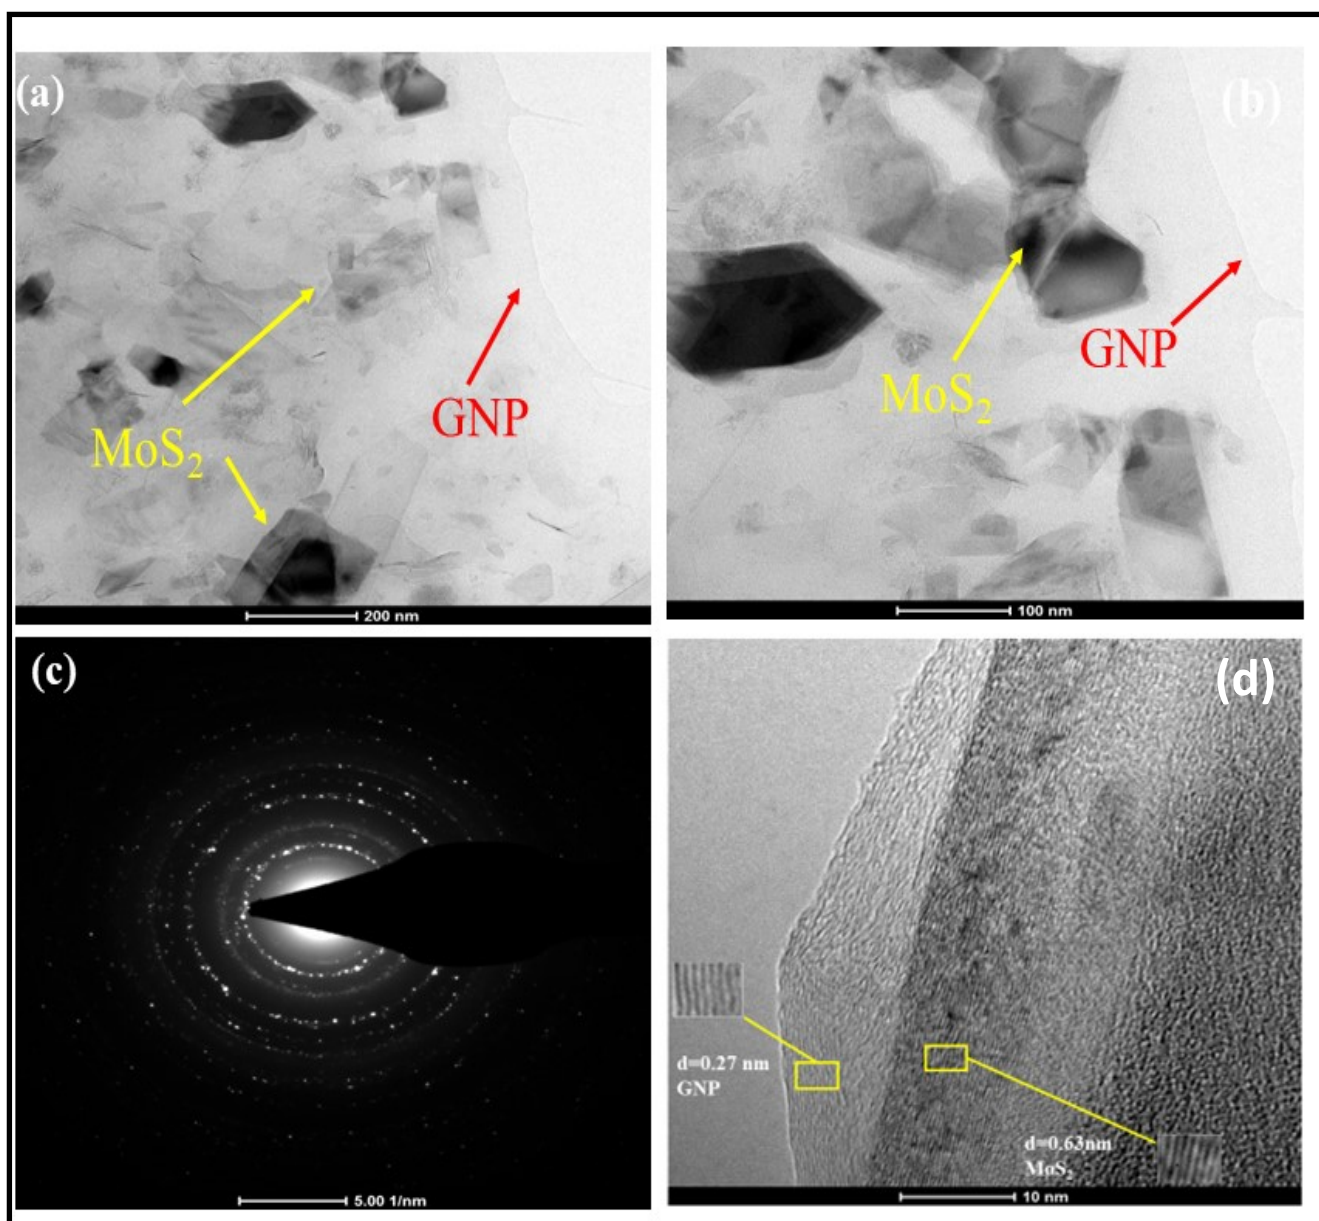

**Figure S7.** (a, b) TEM image of co-exfoliated graphene-nanoplatelets/MoS<sub>2</sub> (c) SAED patterns of the GNP/MoS<sub>2</sub> having concentric rings (d) IFFT image of GNP/MoS<sub>2</sub> marked area.

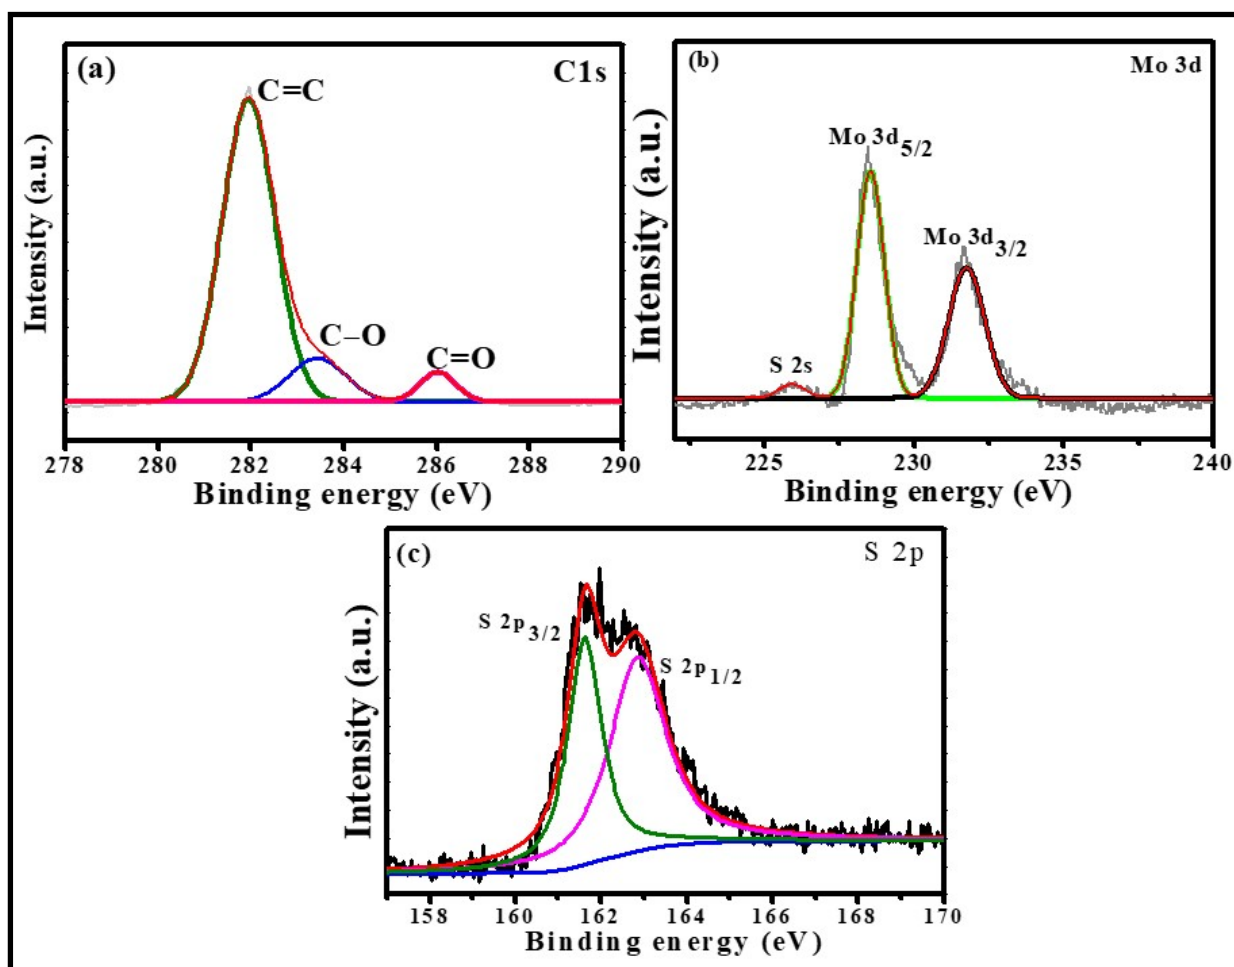

**Figure S8.** High-resolution XPS spectra of (a) C 1s, (b) Mo 3d, and (c) S 2p of Co-exfoliated GNP/MoS<sub>2</sub>.



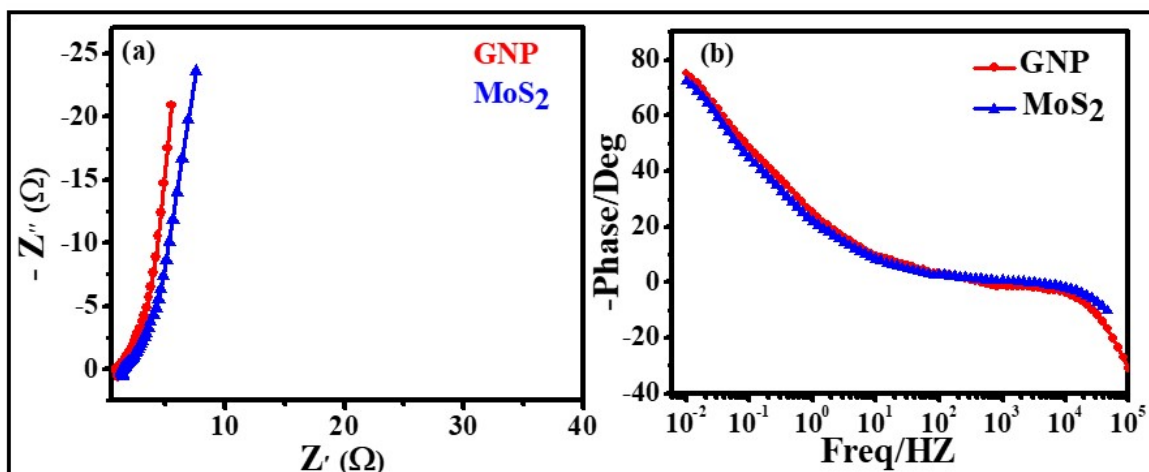

**Figure S9.** (a) EIS of GNP and MoS<sub>2</sub> (b) Bode plot of GNP and MoS<sub>2</sub>.

**Table 1. Circuit Parameters Generated after the Fitting to the Given Equivalent Circuit.**

| Samples              | $R_s$  | $R_{ct}$ | $W$    | $C$     |
|----------------------|--------|----------|--------|---------|
| GNP/MoS <sub>2</sub> | 0.2451 | 0.9555   | 0.5302 | 0.3499  |
| GNP                  | 2.055  | 0.5874   | 0.5252 | 0.03499 |
| MoS <sub>2</sub>     | 1.386  | 0.2282   | 0.4059 | 0.01902 |

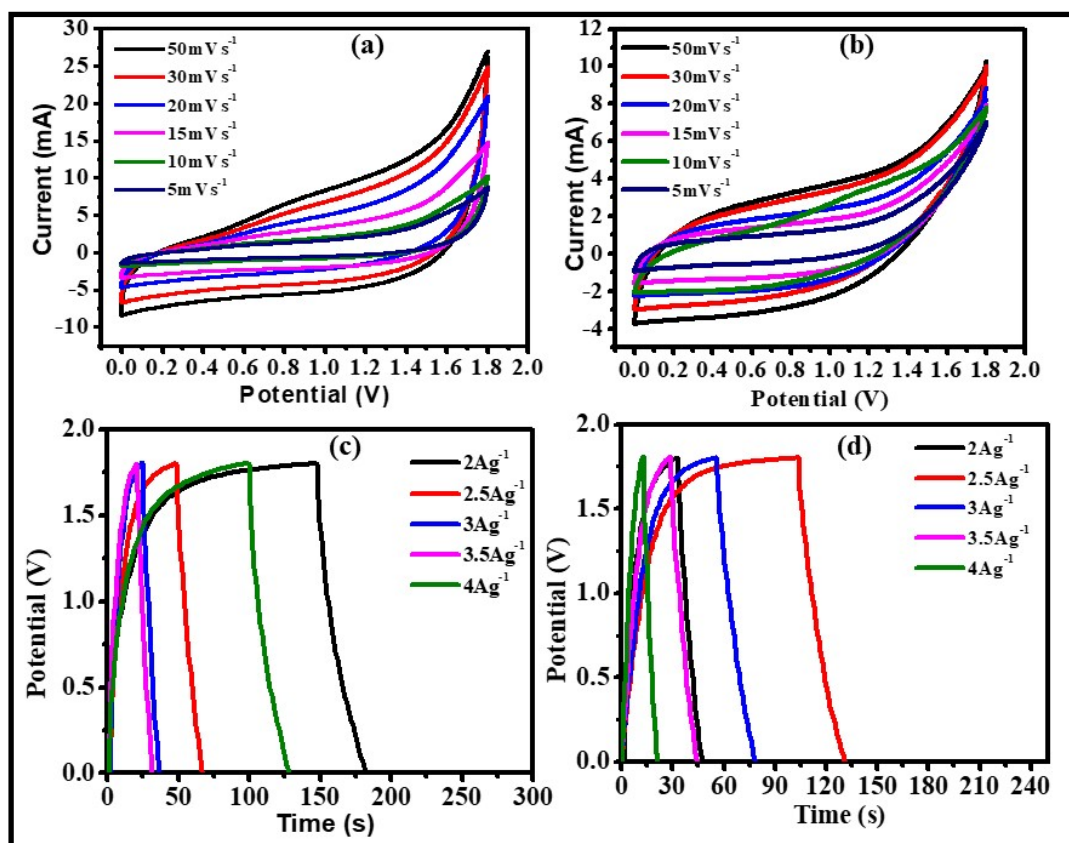

**Figure S10.** CV profile of the ASC devices at various scan rates for (a) NaOH/PVA (b) KOH/PVA. GCD profile of ASC device at different current densities (c) NaOH/PVA and (d) KOH/PVA.
